# Supplementary material for: New Insights into the Antibacterial Activity of Hydroxycoumarins against Ralstonia solanacearum
Source: Molecules. 2016 Apr 8;21(4):468. doi: 10.3390/molecules21040468 (PMC6273506; doi:10.3390/molecules21040468)
Supplement: Supplementary file 1 [file molecules-21-00468-s001.pdf]

# Supplementary Materials: New Insights into the Antibacterial Activity of Hydroxycoumarins against *Ralstonia solanacearum*

Liang Yang, Wei Ding, Yuquan Xu, Dousheng Wu, Shili Li, Juanni Chen and Bing Guo

**TableS1.** The antibacterial activity of plant-derived compounds against *R. solanacearum*.

| Number           | Compound (100 mg/L)       | Antibacterial Rate (%) (Mean $\pm$ SD) |
|------------------|---------------------------|----------------------------------------|
| 1                | Glycyrrhetic acid         | 2.4 $\pm$ 4.5 *                        |
| 2                | Emodin                    | 22.1 $\pm$ 1.3 *                       |
| 3                | Puerarin                  | 4.5 $\pm$ 2.6 *                        |
| 4                | Eugenol                   | 37.7 $\pm$ 5.4 *                       |
| 5                | Quercetin                 | 21.8 $\pm$ 3.5 *                       |
| 6                | Rutin                     | 41.2 $\pm$ 4.6 *                       |
| 7                | Betaine                   | 12.5 $\pm$ 2.4 *                       |
| 8                | Theophylline              | 0.5 $\pm$ 6.5 *                        |
| 9                | 3,4-Dihydroxybenzoic acid | 17.5 $\pm$ 3.6 *                       |
| 10               | Ursodeoxycholic acid      | 0.3 $\pm$ 7.1 *                        |
| 11               | Nicotinic Acid            | 1.6 $\pm$ 4.3 *                        |
| 12               | Tea polyphenol            | 50.2 $\pm$ 8.5                         |
| 13               | Coumarin                  | 55.6 $\pm$ 2.8                         |
| 14               | Umbelliferone             | 60.7 $\pm$ 5.2                         |
| 15               | Clove oil                 | 32.5 $\pm$ 1.8 *                       |
| Positive Control | Thiadiazole Copper        | 54.2 $\pm$ 4.5                         |

The experiment was repeated in triplicates. Asterisks indicate statistically significant differences in antibacterial activity against *R. solanacearum* compared with Thiadiazole Copper treatment. (\* indicates  $p < 0.05$ , Student's t test).

**Table S2.** Primers used in this study.

| Name           | Sequence (5' to 3')    | Source     |
|----------------|------------------------|------------|
| Serc-F         | CCCACCTACGCCATCTATGT   | [1]        |
| Serc-R         | TTGAGGAAGAACGGCACATT   | [1]        |
| <i>fliA</i> -F | TCGGAGACGCCCAGACCTT    | [2]        |
| <i>fliA</i> -R | TCGGAGACGCCCAGACCTT    |            |
| <i>flhC</i> -F | CTTCCTGAACATCTACCGTTTC | [2]        |
| <i>flhC</i> -R | GAGTGATCGACAGCACCTCTT  |            |
| <i>flhD</i> -F | CTGGCTGACATCCTGCTGA    | [2]        |
| <i>flhD</i> -R | CGACATTTGCGATTGCTG     |            |
| PrhA-F         | GGTAGATCAGGCCGTTTCGT   | [1]        |
| PrhA-R         | GACGAGATCGCTGTCATCAA   | [1]        |
| HrpG-F         | GTCTTCACGGTCTGCGAACT   | [1]        |
| HrpG-R         | ATTGACCTCCAATCCATCCA   | [1]        |
| PhcS-F         | CCAGCTGAAAGAGGAACTGG   | [1]        |
| PhcS-R         | AGAAGTTGACGGGGTTGTTG   | [1]        |
| PhcA-F         | TTGTAGGTCTCGCACACCAG   | [1]        |
| PhcA-R         | GCTCGCTCGATCAGTACCTC   | [1]        |
| VsrC-F         | ACCACCCTCTCGCCTTATCT   | This study |
| VsrC-R         | ACAGCCAGACATCCAGCAG    | This study |
| EpsE-F         | CTGGATAAAGCCACGCAAAG   | [1]        |
| EpsE-R         | CAGTGGTACATCGCCATCAC   | [1]        |

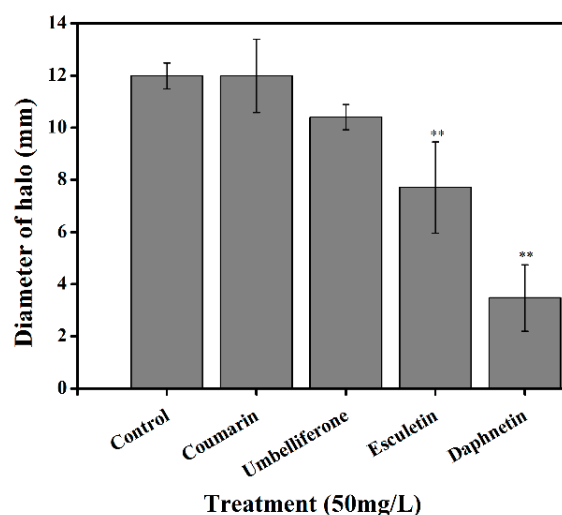

**Figure S1.** The effect of coumarins on the swimming motility of *R. solanacearum*. The halo diameter was quantified on the semi-solid agar plates after treatment with different coumarins. The experiment was performed in duplicates, and each replicate contained at least three plates for each coumarin. (\*\* indicated  $p < 0.05$ ).

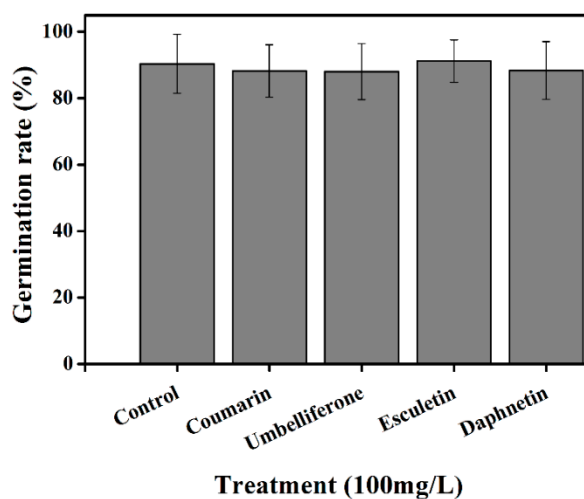

**Figure S2.** The effect of coumarins on the germination rate of tobacco seed. The germination rate of tobacco seed was quantified on the MS medium after treatment with coumarins and cultured for 3–5 days. The results were observed in two independent experiments, and each replicate contained at least five plates for each coumarin.

## References

1. Wu, D.; Ding, W.; Zhang, Y.; Liu, X.; Yang, L. Oleanolic acid induces the type III secretion system of *Ralstonia solanacearum*. *Front. Microbiol.* **2015**, *6*, 1466.
2. Zhang, L.; Xu, J.; Xu, J.; Zhang, H.; He, L.; Feng, J. TssB is essential for virulence and required for type VI secretion system in *Ralstonia solanacearum*. *Microb. Pathog.* **2014**, *74*, 1–7.
